# Supplementary material for: Induction of the nicotinamide riboside kinase NAD+ salvage pathway in a model of sarcoplasmic reticulum dysfunction
Source: PubMed Central journal article supplement (PMC7031948; doi:10.1186/s13395-019-0216-z), 2020-02-19

Supplementary Fig 1.

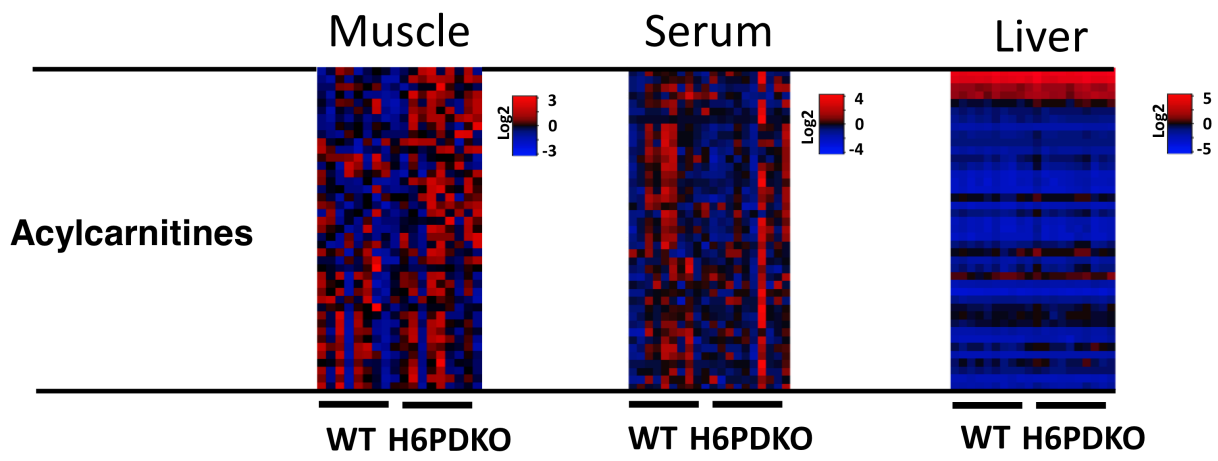

Supplement: 13395_2019_216_MOESM1_ESM.pdf [file 13395_2019_216_MOESM1_ESM.pdf]
